# Supplementary material
Source: publisher site journal article supplement (https://www.dovepress.com/article/462848)
Supplement: Supplementary file 1 [file get_supplementary_file.php]

**Supplementary table 1** multivariable cox regression analysis of the association between SIRI levels and all-cause death in model3

| Variables | HR | CIL | CIU | P-Value |
| --- | --- | --- | --- | --- |
| Q1 | 1.00 | reference | |  |
| Q2 | 1.17 | 1.01 | 1.35 | 0.031 |
| Q3 | 1.31 | 1.13 | 1.52 | <0.001 |
| Q4 | 1.51 | 1.30 | 1.76 | <0.001 |
| age | 1.03 | 1.03 | 1.04 | <0.001 |
| gender | 0.88 | 0.79 | 0.98 | 0.023 |
| AF | 1.01 | 0.88 | 1.16 | 0.885 |
| CAD | 1.11 | 0.92 | 1.35 | 0.278 |
| AMI | 0.95 | 0.86 | 1.05 | 0.198 |
| PCI | 0.80 | 0.69 | 0.92 | 0.002 |
| DM | 1.40 | 1.26 | 1.55 | <0.001 |
| stroke | 1.21 | 1.04 | 1.42 | 0.017 |
| anemia | 1.47 | 1.32 | 1.62 | <0.001 |
| COPD | 1.34 | 1.05 | 1.71 | 0.017 |
| HT | 1.14 | 1.02 | 1.28 | 0.024 |
| LVEF | 0.99 | 0.99 | 1.00 | 0.119 |
| eGFR | 1.00 | 0.99 | 1.00 | 0.061 |
| ACEI/ARB | 0.95 | 0.85 | 1.07 | 0.420 |
| statins | 1.05 | 0.88 | 1.26 | 0.580 |
| β-blocker | 0.86 | 0.77 | 0.96 | 0.008 |
| LDL-C | 1.03 | 0.97 | 1.08 | 0.348 |
| HDL-C | 0.84 | 0.70 | 1.00 | 0.048 |

**Abbreviations:** SIRI, systemic inflammation response index;Q, quartile;HR, hazard ratio; CI, confidence interval;AMI, acute myocardial infarction; AF, atrial fibrillation; HT, hypertension; DM, diabetes mellitus; CAD, coronary artery disease; PCI, percutaneous interventions; COPD, chronic obstructive pulmonary disease; LDL-C, low-density lipoprotein cholesterol; HDL-C, high-density lipoprotein cholesterol; eGFR, estimated glomerular filtration rate; LVEF, left ventricular ejection fraction; ACEI/ARB, angiotensin-converting enzyme inhibitor/angiotensin receptor blocker.

**Supplementary table 2** multivariable cox regression analysis of the association between SIRI levels and cardiovascular death in model3

| Variables | HR | CIL | CIU | P-Value |
| --- | --- | --- | --- | --- |
| Q1 | 1.00 | reference |  |  |
| Q2 | 1.22 | 0.99 | 1.51 | 0.065 |
| Q3 | 1.50 | 1.20 | 1.86 | <0.001 |
| Q4 | 1.73 | 1.37 | 2.18 | <0.001 |
| age | 1.03 | 1.02 | 1.04 | <0.001 |
| gender | 0.93 | 0.80 | 1.09 | 0.420 |
| AF | 1.28 | 1.06 | 1.55 | 0.011 |
| AMI | 0.81 | 0.62 | 1.03 | 0.308 |
| PCI | 0.76 | 0.61 | 0.93 | 0.010 |
| DM | 1.64 | 1.42 | 1.91 | <0.001 |
| stroke | 1.41 | 1.13 | 1.75 | 0.002 |
| anemia | 1.65 | 1.42 | 1.92 | <0.001 |
| CAD | 1.35 | 1.01 | 1.79 | 0.038 |
| COPD | 1.27 | 0.87 | 1.84 | 0.207 |
| HT | 1.32 | 1.10 | 1.57 | 0.002 |
| LVEF | 0.99 | 0.98 | 1.00 | 0.095 |
| eGFR | 0.99 | 0.99 | 1.00 | 0.594 |
| ACEI/ARB | 1.00 | 0.84 | 1.19 | 0.981 |
| statins | 0.96 | 0.73 | 1.25 | 0.782 |
| β-blocker | 0.89 | 0.76 | 1.05 | 0.173 |
| LDL-C | 1.12 | 1.05 | 1.21 | 0.001 |
| HDL-C | 0.75 | 0.57 | 0.98 | 0.040 |

**Abbreviations:** SIRI, systemic inflammation response index; Q, quartile;HR, hazard ratio; CI, confidence interval;AMI, acute myocardial infarction; AF, atrial fibrillation; HT, hypertension; DM, diabetes mellitus; CAD, coronary artery disease; PCI, percutaneous interventions; COPD, chronic obstructive pulmonary disease; LDL-C, low-density lipoprotein cholesterol; HDL-C, high-density lipoprotein cholesterol; eGFR, estimated glomerular filtration rate; LVEF, left ventricular ejection fraction; ACEI/ARB, angiotensin-converting enzyme inhibitor/angiotensin receptor blocker.

**Supplemental Figure.1** Flowchart of study participants. SIRI: Systemic inflammation response index


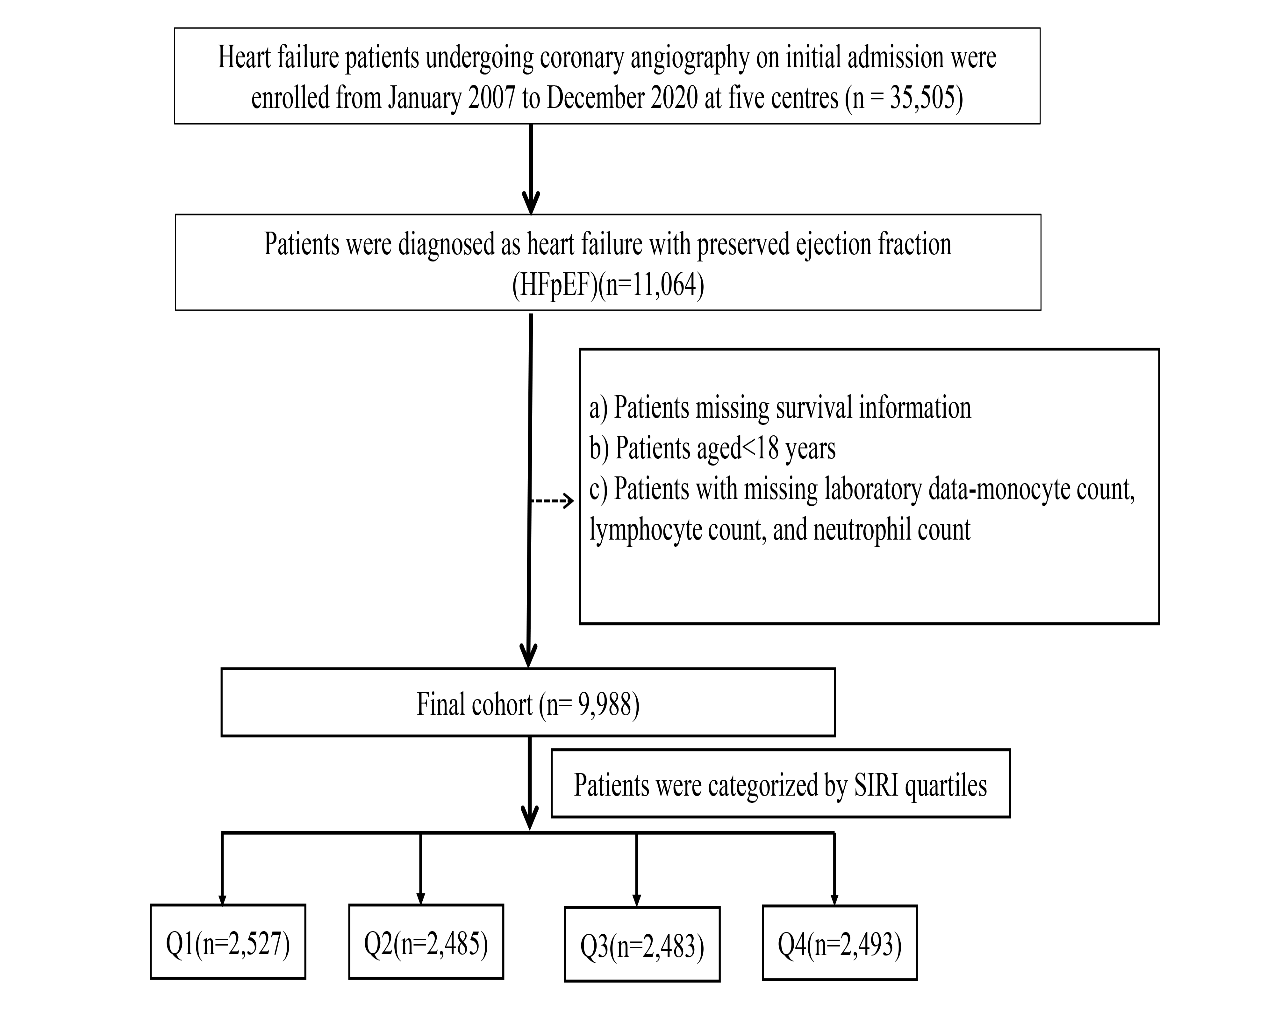


**Abbreviations:** SIRI, systemic inflammation response index; HFpEF, Heart failure with preserved ejection fraction; Q, quartile.

**Supplemental Figure.2** Subgroups analyses for the association between SIRI level and all-cause death





**Abbreviations:** SIRI, systemic inflammation response index; Q, quartile; HR, hazard ratio; CI, confidence interval; AMI, acute myocardial infarction; CAD, coronary artery disease; CKD, chronic kidney disease.

**Supplemental Figure.3** Subgroups analyses for the association between SIRI level and cardiovascular death





**Abbreviations:** SIRI, systemic inflammation response index; Q, quartile; HR, hazard ratio; CI, confidence interval; AMI, acute myocardial infarction; CAD, coronary artery disease; CKD, chronic kidney disease.
